# Supplementary material
Source: PubMed Central journal article supplement (PMC7612445)
Supplement: EMS142055-supplement-Supplementary_Material.pdf [file EMS142055-supplement-Supplementary_Material.pdf]

# Online-Only Supplemental Material

## Glucose-dependent insulinotropic peptide in the high normal range is associated with increased carotid intima-media thickness

Amra Jujić, Peter M Nilsson, Naeimeh Atabaki-Pasdar, Anna Dieden, Tiinamaija Tuomi, MD, Paul W Franks, Jens Juul Holst, Signe Sørensen Torekov, Susana Ravassa, Javier Díez, Margaretha Persson, Emma Ahlqvist, Olle Melander, Maria F Gomez, Leif Groop, Martin Magnusson

### Contents

|                                                                                                                                               |   |
|-----------------------------------------------------------------------------------------------------------------------------------------------|---|
| <b>Supplemental Table S1.</b> Associations of fasting and post-challenge GIP and $IMT_{meanCCA}/IMT_{maxBulb}$ .....                          | 2 |
| <b>Supplemental Table S2.</b> Associations of fasting and post-challenge GLP-1 and $IMT_{meanCCA}/IMT_{maxBulb}$ .....                        | 3 |
| <b>Supplemental Table S3.</b> Associations between GIP and $IMT_{meanCCA}/IMT_{maxBulb}$ in subjects free from diabetes .....                 | 4 |
| <b>Supplemental Table S4.</b> Associations between GLP-1 and $IMT_{meanCCA}/IMT_{maxBulb}$ in subjects free from diabetes .....               | 5 |
| <b>Supplemental Table S5.</b> Associations of fasting GIP and GLP-1 with $IMT_{meanCCA}/IMT_{maxBulb}$ in subjects <b>with</b> diabetes ..... | 6 |
| <b>Supplemental Table S6.</b> Standardized associations of fasting and post-challenge GIP/GLP-1 and $IMT_{meanCCA}/IMT_{maxBulb}$ .....       | 7 |

**Supplemental Table S1.** Associations of fasting and post-challenge GIP and  $IMT_{meanCCA}/IMT_{maxBulb}$

|                          | $IMT_{meanCCA}$            |                             |                             |                             | $IMT_{maxBulb}$            |                             |                             |                             |
|--------------------------|----------------------------|-----------------------------|-----------------------------|-----------------------------|----------------------------|-----------------------------|-----------------------------|-----------------------------|
|                          | GIP <sup>f</sup><br>n=3342 |                             | GIP <sup>2h</sup><br>n=2948 |                             | GIP <sup>f</sup><br>n=3229 |                             | GIP <sup>2h</sup><br>n=2856 |                             |
|                          | $\beta$                    | p                           | $\beta$                     | p                           | $\beta$                    | p                           | $\beta$                     | p                           |
|                          | <b>Unadjusted</b>          |                             |                             |                             |                            |                             |                             |                             |
| GIP                      | 0.016                      | <b>3.0x10<sup>-5</sup></b>  | 0.010                       | <b>0.012</b>                | 0.031                      | <b>7.0x10<sup>-5</sup></b>  | 0.011                       | 0.140                       |
|                          | <b>Model 1</b>             |                             |                             |                             |                            |                             |                             |                             |
| GIP                      | 0.012                      | <b>0.002</b>                | 0.005                       | 0.171                       | 0.024                      | <b>2.8x10<sup>-4</sup></b>  | 0.010                       | 0.162                       |
| Sex                      | -0.039                     | <b>3.8x10<sup>-7</sup></b>  | -0.037                      | <b>3.2x10<sup>-6</sup></b>  | -0.105                     | <b>4.0x10<sup>-15</sup></b> | -0.119                      | <b>4.6x10<sup>-16</sup></b> |
| Age                      | 0.009                      | <b>3.9x10<sup>-39</sup></b> | 0.008                       | <b>5.5x10<sup>-34</sup></b> | 0.013                      | <b>3.9x10<sup>-26</sup></b> | 0.013                       | <b>7.5x10<sup>-23</sup></b> |
|                          | <b>Model 2a</b>            |                             | <b>Model 2b</b>             |                             | <b>Model 2a</b>            |                             | <b>Model 2b</b>             |                             |
| GIP                      | 0.010                      | <b>0.010</b>                | 0.005                       | 0.188                       | 0.014                      | <b>0.040</b>                | 0.003                       | 0.668                       |
| Sex                      | -0.022                     | <b>0.008</b>                | -0.013                      | 0.140                       | -0.077                     | <b>7.8x10<sup>-8</sup></b>  | -0.086                      | <b>4.3x10<sup>-8</sup></b>  |
| Age                      | 0.008                      | <b>8.3x10<sup>-30</sup></b> | 0.007                       | <b>9.7x10<sup>-26</sup></b> | 0.010                      | <b>6.2x10<sup>-18</sup></b> | 0.010                       | <b>5.1x10<sup>-15</sup></b> |
| BMI                      | 0.001                      | 0.203                       | 0.002                       | <b>0.013</b>                | -0.001                     | 0.583                       | 0.000                       | 0.812                       |
| AHT                      | -0.026                     | <b>0.004</b>                | -0.018                      | <b>0.044</b>                | 0.022                      | 0.160                       | 0.032                       | <b>0.048</b>                |
| Lipid-lowering treatment | 0.016                      | 0.073                       | 0.013                       | 0.140                       | 0.056                      | <b>3.4x10<sup>-4</sup></b>  | 0.053                       | <b>0.002</b>                |
| Triglycerides            | -0.004                     | 0.682                       | -0.009                      | 0.366                       | 0.013                      | 0.471                       | 0.001                       | 0.955                       |
| Current smoking          | 0.043                      | <b>0.003</b>                | 0.035                       | <b>0.016</b>                | 0.111                      | <b>1.2x10<sup>-5</sup></b>  | 0.114                       | <b>1.9x10<sup>-5</sup></b>  |
| Systolic blood pressure  | 0.002                      | <b>7.3x10<sup>-20</sup></b> | 0.002                       | <b>1.9x10<sup>-16</sup></b> | 0.003                      | <b>3.6x10<sup>-14</sup></b> | 0.003                       | <b>9.8x10<sup>-14</sup></b> |
| Diabetes status          | -0.013                     | 0.401                       | -0.018                      | 0.826                       | -0.014                     | 0.597                       | 0.170                       | 0.253                       |
| HDL                      | -0.055                     | <b>3.6x10<sup>-4</sup></b>  | -0.072                      | <b>4.4x10<sup>-6</sup></b>  | -0.057                     | <b>0.035</b>                | -0.064                      | <b>0.026</b>                |
| Glucose                  | -0.026                     | 0.323                       | 0.014                       | 0.316                       | 0.046                      | 0.327                       | 0.008                       | 0.749                       |
| Insulin                  | -0.010                     | 0.236                       | -0.015                      | <b>0.026</b>                | -0.007                     | 0.642                       | -0.008                      | 0.520                       |

<sup>f</sup> Fasting

<sup>2h</sup> Post-challenge (at 120 minutes)

Values are unstandardized  $\beta$  coefficients (1 SD increase of incretins per mm  $IMT_{meanCCA}$  or  $IMT_{maxBulb}$ ).

Model 2a: adjusted for age, sex, BMI, systolic blood pressure (SBP), smoking status, diabetes status, FPG, fasting insulin, HDL, triglycerides, AHT and lipid-lowering treatment.

Model 2b: adjusted for age, sex, BMI, SBP, smoking status, diabetes status, post-challenge plasma glucose, post-challenge insulin, HDL, triglycerides, AHT and lipid-lowering treatment.

AHT=antihypertensive treatment; BMI=body mass index; GIP= glucose-dependent insulinotropic peptide; HDL=high density lipoprotein cholesterol; HOMA-IR= Homeostatic Model Assessment of Insulin Resistance,  $IMT_{meanCCA}$ =intima-media thickness in the common carotid artery;  $IMT_{maxBulb}$ =intima-media thickness in the carotid bifurcation; SBP=systolic blood pressure

**Supplemental Table S2.** Associations of fasting and post-challenge GLP-1 and  $IMT_{meanCCA}/IMT_{maxBulb}$

|                          | $IMT_{meanCCA}$              |                             |                               |                             | $IMT_{maxBulb}$              |                             |                               |                             |
|--------------------------|------------------------------|-----------------------------|-------------------------------|-----------------------------|------------------------------|-----------------------------|-------------------------------|-----------------------------|
|                          | GLP-1 <sup>f</sup><br>n=3299 |                             | GLP-1 <sup>2h</sup><br>n=2893 |                             | GLP-1 <sup>f</sup><br>n=3187 |                             | GLP-1 <sup>2h</sup><br>n=2828 |                             |
|                          | $\beta$                      | p                           | $\beta$                       | p                           | $\beta$                      | p                           | $\beta$                       | p                           |
|                          | <b>Unadjusted</b>            |                             |                               |                             |                              |                             |                               |                             |
| GLP-1                    | -0.005                       | 0.244                       | -0.007                        | 0.097                       | -0.015                       | <b>0.033</b>                | -0.019                        | <b>0.009</b>                |
|                          | <b>Model 1</b>               |                             |                               |                             |                              |                             |                               |                             |
| GLP-1                    | -0.005                       | 0.174                       | -0.010                        | <b>0.008</b>                | -0.016                       | <b>0.016</b>                | -0.017                        | <b>0.018</b>                |
| Sex                      | -0.042                       | <b>7.2x10<sup>-8</sup></b>  | -0.032                        | <b>6.1x10<sup>-5</sup></b>  | -0.109                       | <b>9.0x10<sup>-16</sup></b> | -0.108                        | <b>4.4x10<sup>-13</sup></b> |
| Age                      | 0.009                        | <b>2.4x10<sup>-40</sup></b> | 0.009                         | <b>8.4x10<sup>-37</sup></b> | 0.013                        | <b>9.7x10<sup>-27</sup></b> | 0.013                         | <b>3.1x10<sup>-24</sup></b> |
|                          | <b>Model 2a</b>              |                             | <b>Model 2b</b>               |                             | <b>Model 2a</b>              |                             | <b>Model 2b</b>               |                             |
| GLP-1                    | -0.003                       | 0.426                       | -0.006                        | 0.142                       | -0.016                       | <b>0.014</b>                | -0.013                        | 0.069                       |
| Sex                      | -0.025                       | <b>0.003</b>                | -0.011                        | 0.200                       | -0.081                       | <b>2.2x10<sup>-8</sup></b>  | -0.080                        | <b>3.6x10<sup>-7</sup></b>  |
| Age                      | 0.008                        | <b>1.2x10<sup>-30</sup></b> | 0.008                         | <b>4.2x10<sup>-27</sup></b> | 0.010                        | <b>5.3x10<sup>-18</sup></b> | 0.010                         | <b>4.1x10<sup>-15</sup></b> |
| BMI                      | 0.001                        | 0.196                       | 0.002                         | <b>0.020</b>                | -0.001                       | 0.419                       | -0.001                        | 0.581                       |
| AHT                      | -0.023                       | <b>0.009</b>                | -0.015                        | 0.094                       | 0.020                        | 0.207                       | 0.033                         | <b>0.044</b>                |
| Lipid-lowering treatment | 0.017                        | 0.063                       | 0.013                         | 0.140                       | 0.062                        | <b>7.6x10<sup>-5</sup></b>  | 0.055                         | <b>0.001</b>                |
| Triglycerides            | -0.002                       | 0.803                       | -0.008                        | 0.441                       | 0.015                        | 0.401                       | 0.001                         | 0.940                       |
| Current smoking          | 0.046                        | <b>0.002</b>                | 0.038                         | <b>0.010</b>                | 0.113                        | <b>10.0x10<sup>-6</sup></b> | 0.111                         | <b>3.3x10<sup>-5</sup></b>  |
| Systolic blood pressure  | 0.002                        | <b>6.7x10<sup>-19</sup></b> | 0.002                         | <b>9.6x10<sup>-16</sup></b> | 0.003                        | <b>2.6x10<sup>-13</sup></b> | 0.003                         | <b>1.6x10<sup>-13</sup></b> |
| Diabetes status          | -0.008                       | 0.612                       | -0.017                        | 0.834                       | -0.003                       | 0.920                       | 0.173                         | 0.247                       |
| HDL                      | -0.048                       | <b>0.002</b>                | -0.068                        | <b>1.6x10<sup>-5</sup></b>  | -0.046                       | 0.090                       | -0.059                        | <b>0.040</b>                |
| Glucose                  | -0.024                       | 0.375                       | 0.012                         | 0.375                       | 0.053                        | 0.257                       | 0.002                         | 0.924                       |
| Insulin                  | -0.007                       | 0.451                       | -0.016                        | <b>0.024</b>                | 0.003                        | 0.836                       | -0.008                        | 0.548                       |

<sup>f</sup>Fasting

<sup>2h</sup> Post-challenge (at 120 minutes)

Values are unstandardized  $\beta$  coefficients (1 SD increase of incretins per mm  $IMT_{meanCCA}$  or  $IMT_{maxBulb}$ ).

Model 2a: adjusted for age, sex, BMI, systolic blood pressure (SBP), smoking status, diabetes status, FPG, fasting insulin, HDL, triglycerides, AHT and lipid-lowering treatment.

Model 2b: adjusted for age, sex, BMI, SBP, smoking status, diabetes status, post-challenge plasma glucose, post-challenge insulin, HDL, triglycerides, AHT and lipid-lowering treatment.

AHT=antihypertensive treatment; BMI=body mass index; GLP-1=glucagon-like peptide 1; HDL=high density lipoprotein cholesterol; HOMA-IR=Homeostatic Model Assessment of Insulin Resistance,  $IMT_{meanCCA}$ =intima-media thickness in the common carotid artery;  $IMT_{maxBulb}$ =intima-media thickness in the carotid bifurcation; SBP=systolic blood pressure

**Supplemental Table S3.** Associations between GIP and IMT<sub>mean</sub>CCA/IMT<sub>max</sub>Bulb in subjects free from diabetes

|                          | IMT <sub>mean</sub> CCA    |                             |                             |                             | IMT <sub>max</sub> Bulb    |                             |                             |                             |
|--------------------------|----------------------------|-----------------------------|-----------------------------|-----------------------------|----------------------------|-----------------------------|-----------------------------|-----------------------------|
|                          | GIP <sup>f</sup><br>n=2986 |                             | GIP <sup>2h</sup><br>n=2806 |                             | GIP <sup>f</sup><br>n=2897 |                             | GIP <sup>2h</sup><br>n=2708 |                             |
|                          | β                          | p                           | β                           | p                           | β                          | p                           | β                           | p                           |
|                          | <b>Unadjusted</b>          |                             |                             |                             |                            |                             |                             |                             |
| GIP                      | 0.014                      | <b>3.7x10<sup>-4</sup></b>  | 0.010                       | <b>0.013</b>                | 0.026                      | <b>4.5x10<sup>-4</sup></b>  | 0.011                       | 0.150                       |
|                          | <b>Model 1</b>             |                             |                             |                             |                            |                             |                             |                             |
| GIP                      | 0.010                      | <b>0.012</b>                | 0.005                       | 0.184                       | 0.019                      | <b>0.007</b>                | 0.010                       | 0.195                       |
| Sex                      | -0.034                     | <b>1.1x10<sup>-5</sup></b>  | -0.038                      | <b>2.2x10<sup>-6</sup></b>  | -0.113                     | <b>1.7x10<sup>-15</sup></b> | -0.118                      | <b>2.8x10<sup>-15</sup></b> |
| Age                      | 0.009                      | <b>4.4x10<sup>-37</sup></b> | 0.009                       | <b>1.6x10<sup>-33</sup></b> | 0.013                      | <b>2.3x10<sup>-25</sup></b> | 0.013                       | <b>7.6x10<sup>-23</sup></b> |
|                          | <b>Model 3a</b>            |                             | <b>Model 3b</b>             |                             | <b>Model 3a</b>            |                             | <b>Model 3b</b>             |                             |
| GIP                      | 0.008                      | <b>0.033</b>                | 0.003                       | 0.401                       | 0.012                      | 0.096                       | 0.001                       | 0.872                       |
| Sex                      | -0.016                     | 0.053                       | -0.018                      | <b>0.041</b>                | -0.087                     | <b>8.4x10<sup>-9</sup></b>  | -0.087                      | <b>3.1x10<sup>-8</sup></b>  |
| Age                      | 0.008                      | <b>1.5x10<sup>-28</sup></b> | 0.008                       | <b>8.7x10<sup>-26</sup></b> | 0.011                      | <b>3.2x10<sup>-17</sup></b> | 0.010                       | <b>2.4x10<sup>-15</sup></b> |
| BMI                      | 0.002                      | <b>0.018</b>                | 0.002                       | <b>0.029</b>                | -0.001                     | 0.567                       | -0.003                      | 0.128                       |
| AHT                      | -0.020                     | <b>0.024</b>                | -0.018                      | <b>0.049</b>                | 0.029                      | 0.070                       | 0.035                       | <b>0.032</b>                |
| Lipid-lowering treatment | 0.009                      | 0.309                       | 0.009                       | 0.327                       | 0.051                      | <b>0.002</b>                | 0.045                       | <b>0.009</b>                |
| Triglycerides            | -0.010                     | 0.319                       | -0.011                      | 0.289                       | 0.008                      | 0.662                       | 0.002                       | 0.935                       |
| Current smoking          | 0.044                      | <b>0.003</b>                | 0.042                       | <b>0.006</b>                | 0.115                      | <b>1.2x10<sup>-5</sup></b>  | 0.124                       | <b>6.1x10<sup>-6</sup></b>  |
| Systolic blood pressure  | 0.002                      | <b>1.1x10<sup>-17</sup></b> | 0.002                       | <b>5.0x10<sup>-17</sup></b> | 0.003                      | <b>1.3x10<sup>-12</sup></b> | 0.003                       | <b>6.7x10<sup>-13</sup></b> |
| HDL                      | -0.060                     | <b>1.3x10<sup>-4</sup></b>  | -0.066                      | <b>3.3x10<sup>-5</sup></b>  | -0.057                     | <b>0.045</b>                | -0.054                      | 0.067                       |
| HOMA-IR                  | -0.015                     | 0.082                       | -0.012                      | 0.172                       | 0.000                      | 0.978                       | 0.018                       | 0.256                       |

<sup>f</sup> Fasting

<sup>2h</sup> Post-challenge (at 120 minutes)

Values are unstandardized β coefficients.

Model 3a: adjusted for age, sex, BMI, SBP, smoking status, HOMA-IR, fasting plasma glucose, fasting insulin, HDL, triglycerides, AHT and lipid-lowering treatment.

Model 3b: adjusted for age, sex, BMI, SBP, smoking status, HOMA-IR, post-challenge plasma glucose, post-challenge insulin, HDL, triglycerides, AHT and lipid-lowering treatment.

AHT=antihypertensive treatment; BMI=body mass index; GIP=glucose-dependent insulinotropic peptide; HDL=high density lipoprotein cholesterol; HOMA-IR= Homeostatic Model Assessment of Insulin Resistance, IMT<sub>mean</sub>CCA=intima-media thickness in the common carotid artery; IMT<sub>max</sub>Bulb=intima-media thickness in the carotid bifurcation; SBP=systolic blood pressure

**Supplemental Table S4.** Associations between GLP-1 and  $IMT_{meanCCA}/IMT_{maxBulb}$  in subjects free from diabetes

|                          | $IMT_{meanCCA}$              |                                         |                               |                                          | $IMT_{maxBulb}$              |                                          |                               |                                         |
|--------------------------|------------------------------|-----------------------------------------|-------------------------------|------------------------------------------|------------------------------|------------------------------------------|-------------------------------|-----------------------------------------|
|                          | GLP-1 <sup>f</sup><br>n=2949 |                                         | GLP-1 <sup>2h</sup><br>n=2908 |                                          | GLP-1 <sup>f</sup><br>n=2859 |                                          | GLP-1 <sup>2h</sup><br>n=2808 |                                         |
|                          | $\beta$                      | p                                       | $\beta$                       | p                                        | $\beta$                      | p                                        | $\beta$                       | p                                       |
|                          | <b>Unadjusted</b>            |                                         |                               |                                          |                              |                                          |                               |                                         |
| GLP-1                    | -0.007                       | 0.071                                   | -0.008                        | <b>0.031</b>                             | -0.019                       | <b>0.008</b>                             | -0.016                        | <b>0.026</b>                            |
|                          | <b>Model 1</b>               |                                         |                               |                                          |                              |                                          |                               |                                         |
| GLP-1                    | -0.007                       | 0.062                                   | -0.013                        | <b>0.002</b>                             | -0.020                       | <b>0.006</b>                             | -0.014                        | <b>0.055</b>                            |
| Sex                      | -0.036                       | <b><math>2.8 \times 10^{-6}</math></b>  | -0.030                        | <b><math>2.2 \times 10^{-4}</math></b>   | -0.115                       | <b><math>6.5 \times 10^{-16}</math></b>  | -0.106                        | <b><math>9.6 \times 10^{-13}</math></b> |
| Age                      | 0.009                        | <b><math>4.2 \times 10^{-38}</math></b> | 0.009                         | <b><math>2.2 \times 10^{-39}</math></b>  | 0.013                        | <b><math>1.2 \times 10^{-25}</math></b>  | 0.013                         | <b><math>7.8 \times 10^{-26}</math></b> |
|                          | <b>Model 3a</b>              |                                         | <b>Model 3b</b>               |                                          | <b>Model 3a</b>              |                                          | <b>Model 3b</b>               |                                         |
| GLP-1                    | -0.004                       | 0.265                                   | -0.009                        | <b>0.020</b>                             | -0.017                       | <b>0.016</b>                             | -0.010                        | 0.176                                   |
| Sex                      | -0.019                       | <b>0.018</b>                            | -0.015                        | <b>0.082</b>                             | -0.090                       | <b><math>2.5 \times 10^{-9}</math></b>   | -0.082                        | <b><math>1.4 \times 10^{-7}</math></b>  |
| Age                      | 0.008                        | <b><math>3.0 \times 10^{-29}</math></b> | 0.008                         | <b><math>1.0 \times 10^{-29}</math></b>  | 0.011                        | <b><math>3.8 \times 10^{-17}</math></b>  | 0.011                         | <b><math>5.0 \times 10^{-17}</math></b> |
| BMI                      | 0.002                        | <b>0.019</b>                            | 0.002                         | <b>0.024</b>                             | -0.002                       | 0.438                                    | -0.002                        | 0.280                                   |
| AHT                      | -0.017                       | 0.053                                   | -0.015                        | 0.098                                    | 0.028                        | 0.081                                    | 0.031                         | 0.059                                   |
| Lipid-lowering treatment | 0.010                        | 0.288                                   | 0.008                         | 0.360                                    | 0.056                        | <b>0.001</b>                             | 0.052                         | <b>0.002</b>                            |
| Triglycerides            | -0.008                       | 0.423                                   | -0.008                        | 0.399                                    | 0.009                        | 0.609                                    | 0.007                         | 0.716                                   |
| Current smoking          | 0.048                        | <b>0.001</b>                            | 0.049                         | <b>0.001</b>                             | 0.115                        | <b><math>1.3 \times 10^{-5}</math></b>   | 0.116                         | <b><math>1.5 \times 10^{-5}</math></b>  |
| Systolic blood pressure  | 0.002                        | <b><math>6.3 \times 10^{-17}</math></b> | 0.002                         | <b><math>4.14 \times 10^{-17}</math></b> | 0.003                        | <b><math>6.94 \times 10^{-12}</math></b> | 0.003                         | <b><math>3.4 \times 10^{-12}</math></b> |
| HDL                      | -0.052                       | <b>0.001</b>                            | -0.053                        | <b>0.001</b>                             | -0.048                       | 0.097                                    | -0.058                        | <b>0.046</b>                            |
| HOMA-IR                  | -0.011                       | 0.168                                   | -0.013                        | 0.116                                    | 0.007                        | 0.637                                    | 0.006                         | 0.677                                   |

<sup>f</sup> Fasting

<sup>2h</sup> Post-challenge (at 120 minutes)

Values are unstandardized  $\beta$  coefficients (1 SD increase of incretins per mm  $IMT_{meanCCA}$  or  $IMT_{maxBulb}$ ).

Model 3a: adjusted for age, sex, BMI, SBP, smoking status, HOMA-IR, fasting plasma glucose, fasting insulin, HDL, triglycerides, AHT and lipid-lowering treatment.

Model 3b: adjusted for age, sex, BMI, SBP, smoking status, HOMA-IR, post-challenge plasma glucose, post-challenge insulin, HDL, triglycerides, AHT and lipid-lowering treatment.

AHT=antihypertensive treatment; BMI=body mass index; GLP-1=glucagon-like peptide 1; HDL=high density lipoprotein cholesterol; HOMA-IR= Homeostatic Model Assessment of Insulin Resistance,  $IMT_{meanCCA}$ =intima-media thickness in the common carotid artery;  $IMT_{maxBulb}$ =intima-media thickness in the carotid bifurcation; SBP=systolic blood pressure

**Supplemental Table S5.** Associations of fasting GIP and GLP-1 with  $IMT_{meanCCA}/IMT_{maxBulb}$  in subjects **with** diabetes

|                   | <b>Fasting GIP</b> |       |                 |       | <b>Fasting GLP-1</b> |       |                 |       |
|-------------------|--------------------|-------|-----------------|-------|----------------------|-------|-----------------|-------|
|                   | $IMT_{meanCCA}$    |       | $IMT_{maxbulb}$ |       | $IMT_{meanCCA}$      |       | $IMT_{maxbulb}$ |       |
|                   | n=356              |       | n=332           |       | n=350                |       | n=328           |       |
|                   | $\beta$            | p     | $\beta$         | p     | $\beta$              | p     | $\beta$         | p     |
| <b>Unadjusted</b> | 0.028              | 0.071 | 0.036           | 0.083 | 0.010                | 0.521 | -0.005          | 0.819 |
| <b>Model 1</b>    | 0.026              | 0.078 | 0.033           | 0.110 | 0.006                | 0.682 | -0.007          | 0.750 |
| <b>Model 2</b>    | 0.026              | 0.101 | 0.027           | 0.207 | -0.003               | 0.863 | -0.015          | 0.493 |

Model 1 is adjusted for age and sex. Model 2 is adjusted for adjusted for age, sex, BMI, systolic blood pressure (SBP), smoking status, diabetes status, fasting plasma glucose, fasting insulin, HDL, triglycerides, AHT and lipid-lowering treatment.

**Supplemental Table S6.** Standardized associations of fasting and post-challenge GIP/GLP-1 and  $IMT_{meanCCA}/IMT_{maxBulb}$

| <b><math>IMT_{meanCCA}</math></b> |                           |                       |                          |                           |                       |
|-----------------------------------|---------------------------|-----------------------|--------------------------|---------------------------|-----------------------|
|                                   | <b><math>\beta</math></b> | <b>p</b>              |                          | <b><math>\beta</math></b> | <b>p</b>              |
| Fasting GIP                       | 0.044                     | 0.010                 | Post-challenge GIP       | 0.024                     | 0.211                 |
| Sex                               | -0.048                    | 0.008                 | Sex                      | -0.035                    | 0.078                 |
| Age                               | 0.197                     | $8.3 \times 10^{-30}$ | Age                      | 0.198                     | $1.8 \times 10^{-25}$ |
| BMI                               | 0.025                     | 0.203                 | BMI                      | 0.052                     | 0.009                 |
| AHT                               | -0.057                    | 0.004                 | AHT                      | -0.038                    | 0.072                 |
| Lipid-lowering treatment          | 0.033                     | 0.073                 | Lipid-lowering treatment | 0.029                     | 0.134                 |
| Triglycerides                     | -0.008                    | 0.682                 | Triglycerides            | -0.016                    | 0.444                 |
| Smoking                           | 0.049                     | 0.003                 | Smoking                  | 0.046                     | 0.011                 |
| Systolic blood pressure           | 0.175                     | $7.3 \times 10^{-20}$ | Systolic blood pressure  | 0.164                     | $1.2 \times 10^{-15}$ |
| Diabetes status                   | -0.018                    | 0.401                 | Diabetes status          | -0.004                    | 0.815                 |
| HDL                               | -0.073                    | $3.6 \times 10^{-4}$  | HDL                      | -0.098                    | $6.9 \times 10^{-6}$  |
| Fasting glucose                   | -0.021                    | 0.323                 | Post-challenge glucose   | 0.024                     | 0.259                 |
| Fasting insulin                   | -0.025                    | 0.236                 | Post-challenge insulin   | -0.060                    | 0.012                 |
| <b><math>IMT_{maxBulb}</math></b> |                           |                       |                          |                           |                       |
|                                   | <b><math>\beta</math></b> | <b>p</b>              |                          | <b><math>\beta</math></b> | <b>p</b>              |
| Fasting GLP-1                     | -0.014                    | 0.426                 | Post-challenge GLP-1     | -0.028                    | 0.142                 |
| Sex                               | -0.055                    | 0.003                 | Sex                      | -0.025                    | 0.200                 |
| Age                               | 0.201                     | $1.2 \times 10^{-30}$ | Age                      | 0.206                     | $4.2 \times 10^{-27}$ |
| BMI                               | 0.026                     | 0.196                 | BMI                      | 0.046                     | 0.020                 |
| AHT                               | -0.052                    | 0.009                 | AHT                      | -0.035                    | 0.094                 |
| Lipid-lowering treatment          | 0.034                     | 0.063                 | Lipid-lowering treatment | 0.028                     | 0.140                 |
| Triglycerides                     | -0.005                    | 0.803                 | Triglycerides            | -0.016                    | 0.441                 |
| Smoking                           | 0.053                     | 0.002                 | Smoking                  | 0.047                     | 0.010                 |
| Systolic blood pressure           | 0.172                     | $6.7 \times 10^{-19}$ | Systolic blood pressure  | 0.165                     | $9.6 \times 10^{-16}$ |
| Diabetes status                   | -0.011                    | 0.612                 | Diabetes status          | -0.004                    | 0.834                 |
| HDL                               | -0.065                    | 0.002                 | HDL                      | -0.095                    | $1.6 \times 10^{-5}$  |
| Fasting glucose                   | -0.019                    | 0.375                 | Post-challenge glucose   | 0.019                     | 0.375                 |
| Fasting insulin                   | -0.016                    | 0.451                 | Post-challenge insulin   | -0.053                    | 0.024                 |
| <b><math>IMT_{maxBulb}</math></b> |                           |                       |                          |                           |                       |
|                                   | <b><math>\beta</math></b> | <b>p</b>              |                          | <b><math>\beta</math></b> | <b>p</b>              |
| Fasting GIP                       | 0.036                     | 0.040                 | Post-challenge GIP       | 0.008                     | 0.663                 |
| Sex                               | -0.098                    | $7.8 \times 10^{-8}$  | Sex                      | -0.111                    | $3.7 \times 10^{-8}$  |
| Age                               | 0.152                     | $6.2 \times 10^{-18}$ | Age                      | 0.144                     | $5.8 \times 10^{-14}$ |
| BMI                               | -0.011                    | 0.583                 | BMI                      | -0.008                    | 0.679                 |
| AHT                               | 0.028                     | 0.160                 | AHT                      | 0.042                     | 0.048                 |
| Lipid-lowering treatment          | 0.066                     | $3.4 \times 10^{-4}$  | Lipid-lowering treatment | 0.061                     | 0.002                 |
| Triglycerides                     | 0.015                     | 0.471                 | Triglycerides            | 0.002                     | 0.912                 |
| Smoking                           | 0.075                     | $1.2 \times 10^{-5}$  | Smoking                  | 0.078                     | $2.5 \times 10^{-5}$  |
| Systolic blood pressure           | 0.147                     | $3.6 \times 10^{-14}$ | Systolic blood pressure  | 0.154                     | $1.5 \times 10^{-13}$ |
| Diabetes status                   | -0.011                    | 0.597                 | Diabetes status          | 0.021                     | 0.257                 |
| HDL                               | -0.044                    | 0.035                 | HDL                      | -0.048                    | 0.033                 |
| Fasting glucose                   | 0.021                     | 0.327                 | Post-challenge glucose   | 0.009                     | 0.693                 |

|                          |          |                       |                          |          |                       |
|--------------------------|----------|-----------------------|--------------------------|----------|-----------------------|
| Fasting insulin          | -0.010   | 0.642                 | Post-challenge insulin   | -0.017   | 0.485                 |
|                          | <b>β</b> | <b>p</b>              |                          | <b>β</b> | <b>p</b>              |
| Fasting GLP-1            | -0,042   | 0,014                 | Post-challenge GLP-1     | -0.035   | 0.071                 |
| Sex                      | -0,103   | 2,2x10 <sup>-8</sup>  | Sex                      | -0.103   | 3.4x10 <sup>-7</sup>  |
| Age                      | 0,153    | 5,3x10 <sup>-18</sup> | Age                      | 0.151    | 4.4x10 <sup>-15</sup> |
| BMI                      | -0,016   | 0,419                 | BMI                      | -0.013   | 0.517                 |
| AHT                      | 0,026    | 0,207                 | AHT                      | 0.044    | 0.037                 |
| Lipid-lowering treatment | 0,074    | 7,6x10 <sup>-5</sup>  | Lipid-lowering treatment | 0.060    | 0.002                 |
| Triglycerides            | 0,017    | 0,401                 | Triglycerides            | 0.003    | 0.900                 |
| Smoking                  | 0,076    | 9,9x10 <sup>-6</sup>  | Smoking                  | 0.077    | 2.7x10 <sup>-5</sup>  |
| Systolic blood pressure  | 0,143    | 2,6x10 <sup>-13</sup> | Systolic blood pressure  | 0.154    | 1.5x10 <sup>-13</sup> |
| Diabetes status          | -0,002   | 0,920                 | Diabetes status          | 0.021    | 0.248                 |
| HDL                      | -0,036   | 0,090                 | HDL                      | -0.043   | 0.053                 |
| Fasting glucose          | 0,025    | 0,257                 | Post-challenge glucose   | 0.003    | 0.891                 |
| Fasting insulin          | 0,004    | 0,836                 | Post-challenge insulin   | -0.013   | 0.582                 |

Values are standardized  $\beta$  coefficients.
